# Supplementary material for: A novel polyamine blockade therapy activates an anti-tumor immune response
Source: PubMed Central journal article supplement (PMC5663583; doi:10.18632/oncotarget.20493), 2017-08-24
Supplement: oncotarget-08-84140-s001.pdf [file oncotarget-08-84140-s001.pdf]

# A novel polyamine blockade therapy activates an anti-tumor immune response

## SUPPLEMENTARY MATERIALS

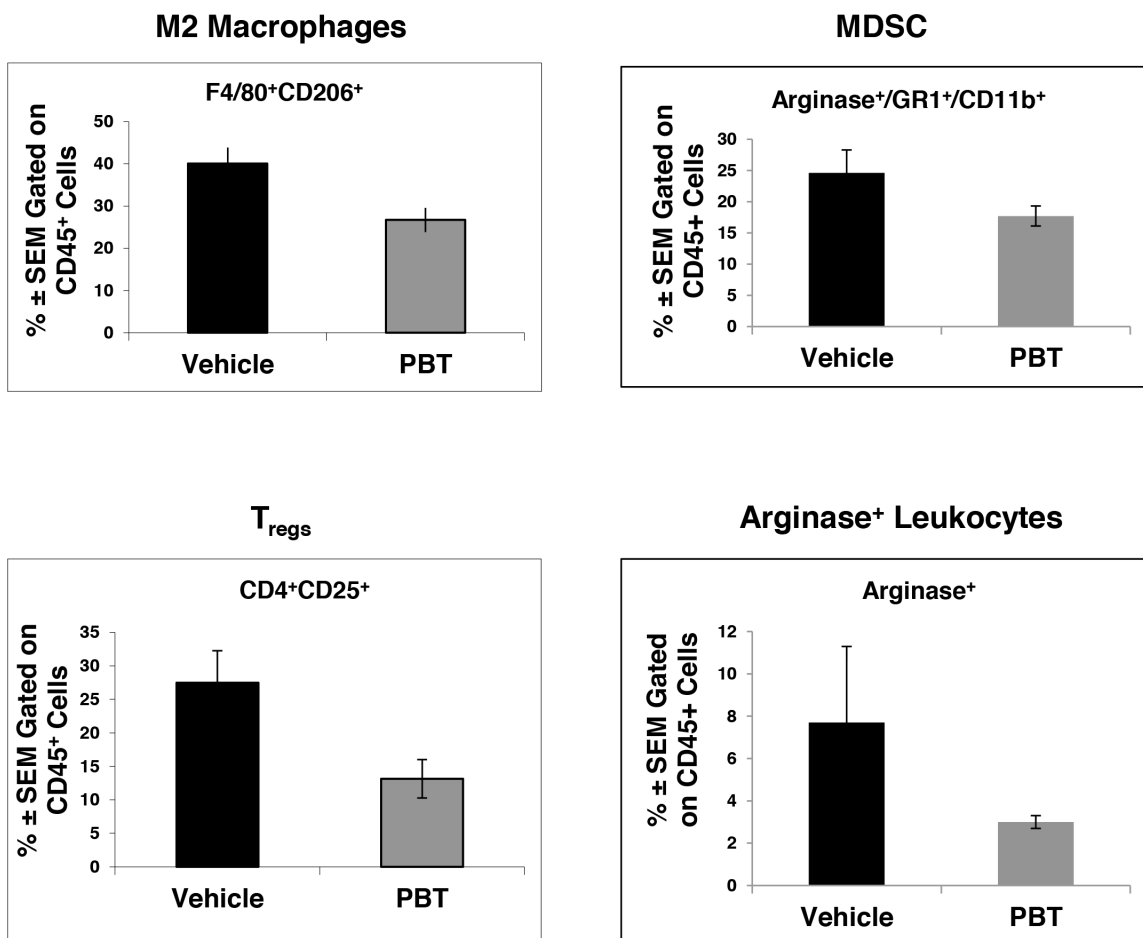

**Supplementary Figure 1: DFMO and Trimer PTI co-treatment reduces the immunosuppressive and pro-tumorigenic cells populations in the spleen.** Upon sacrifice, spleens were excised from CT26.CL25-tumor bearing mice and processed for analysis by flow cytometry. CD45<sup>+</sup> tumor cells were analyzed for the percentage of the indicated cell types. n = 5-10 mice per group. \* = p ≤ 0.05 and # = p ≤ 0.01 compared to indicated group.
